# Supplementary material
Source: PubMed Central journal article supplement (PMC3065387)
Supplement: jcs.079194_3.pdf [file jcs.079194_3.pdf]

**Table S1. Rec24-GFP, Rec24-HA and Rec7-GFP fusion proteins are functional**

| Relevant genotype       | Intragenic Recombination<br>(Ade <sup>+</sup> per 10 <sup>4</sup> Viable Spores) |                                            |
|-------------------------|----------------------------------------------------------------------------------|--------------------------------------------|
|                         | <i>rec24</i>                                                                     | <i>rec7</i>                                |
| <i>rec</i> <sup>+</sup> | 265 ± 17 ( <b>100</b> )<br>CMC329 x CMC381                                       | 267 ± 24 ( <b>100</b> )<br>CMC329 x CMC381 |
| <b>deletion</b>         | 3 ± 2 ( <b>1</b> )<br>CMC373 x CMC408                                            | 1 ± 0.4 ( <b>0.4</b> )<br>CMC376 x CMC409  |
| <b>GFP fusion</b>       | 222 ± 12 ( <b>84</b> )<br>CMC368 x CMC398                                        | 222 ± 14 ( <b>83</b> )<br>CMC382 x CMC385  |
| <b>HA fusion</b>        | 158 ± 12 ( <b>60</b> )<br>CMC377 x CMC388                                        |                                            |

Two independent crosses of *ade6-M26* x *ade6-3049* were performed and plated for recombinant frequency at least twice. Data are the mean ± SD based on the cumulative number of spore colonies, more than 250 Ade<sup>+</sup> colonies in each case except for 6 Ade<sup>+</sup> in *rec24*<sub>-</sub> and 6 Ade<sup>+</sup> in *rec7*<sub>-</sub>. The numbers in parentheses are percentages relative to wild-type. Strains used in the crosses are indicated.
