# Supplementary material
Source: PubMed Central journal article supplement (PMC3065387)
Supplement: jcs.079194_4.pdf [file jcs.079194_4.pdf]

**Table S2. Strains used**

| <b>Strain</b> | <b>Genotype</b>                                                                                                                                                                  | <b>Expts. in</b>  |
|---------------|----------------------------------------------------------------------------------------------------------------------------------------------------------------------------------|-------------------|
| <b>CMC7</b>   | <i>h<sup>-</sup>/h<sup>-</sup> pat1-114/pat1-114 ade6-M210/ade6-M216 leu1-32/leu1-32</i>                                                                                         | Fig. 1 and 7      |
| <b>CMC15</b>  | <i>h<sup>-</sup>/h<sup>-</sup> pat1-114/pat1-114 ade6-M210/ade6-M216 leu1-32/leu1-32<br/>rec24-177::kanMX6/rec24-177::kanMX6</i>                                                 | Fig. 1            |
| <b>CMC36</b>  | <i>h<sup>-</sup>/h<sup>-</sup> pat1-114/pat1-114 ade6-M210/ade6-M216 leu1-32/leu1-32<br/>rec12-207::kanMX6/rec12-207::kanMX6</i>                                                 | Fig. 1            |
| <b>CMC40</b>  | <i>h<sup>-</sup>/h<sup>-</sup> pat1-114/pat1-114 ade6-M210/ade6-M216 leu1-32/leu1-32<br/>rec8-206::kanMX6/rec8-206::kanMX6</i>                                                   | Fig. 1            |
| <b>CMC197</b> | <i>h<sup>-</sup>/h<sup>-</sup> pat1-114/pat1-114 ade6-M210/ade6-M216 leu1-32/leu1-32<br/>rec24-210::GFP-kanMX6/rec24-210::GFP-kanMX6</i>                                         | Figs. 2, 3 and S1 |
| <b>CMC271</b> | <i>h<sup>-</sup>/h<sup>-</sup> pat1-114/pat1-114 ade6-M210/ade6-M216 leu1-32/leu1-32<br/>rec7::GFP/rec7::GFP</i>                                                                 | Figs. 6 and S1    |
| <b>CMC272</b> | <i>h<sup>-</sup>/h<sup>-</sup> pat1-114/pat1-114 ade6-M210/ade6-M216 leu1-32/leu1-32<br/>rec7::GFP/rec7::GFP rec12-207::kanMX6/rec12-207::kanMX6</i>                             | Figs. 6 and S1    |
| <b>CMC273</b> | <i>h<sup>-</sup>/h<sup>-</sup> pat1-114/pat1-114 ade6-M210/ade6-M216 leu1-32/leu1-32<br/>rec7::GFP/rec7::GFP rec24-177::kanMX6/rec24-177::kanMX6</i>                             | Figs. 6 and S1    |
| <b>CMC287</b> | <i>h<sup>-</sup>/h<sup>-</sup> pat1-114/pat1-114 ade6-M210/ade6-M216 leu1-32/leu1-32<br/>rec24-210::GFP-kanMX6/rec24-210::GFP-kanMX6<br/>rec10-175::kanMX6/rec10-175::kanMX6</i> | Figs. 3 and S1    |
| <b>CMC291</b> | <i>h<sup>-</sup>/h<sup>-</sup> pat1-114/pat1-114 ade6-M210/ade6-M216 leu1-32/leu1-32<br/>rec24-210::GFP-kanMX6/rec24-210::GFP-kanMX6<br/>rec12-207::kanMX6/rec12-207::kanMX6</i> | Figs. 3 and S1    |
| <b>CMC302</b> | <i>h<sup>-</sup>/h<sup>-</sup> pat1-114/pat1-114 ade6-M210/ade6-M216 leu1-32/leu1-32<br/>rec7::GFP/rec7::GFP rec24-211::HA-kanMX6/rec24-211::HA-kanMX6</i>                       | Fig. 7            |
| <b>CMC304</b> | <i>h<sup>-</sup>/h<sup>-</sup> pat1-114/pat1-114 ade6-M210/ade6-M216 leu1-32/leu1-32<br/>rec24-210::GFP-kanMX6/rec24-210::GFP-kanMX6<br/>rec7-212::kanMX6/rec7-212::kanMX6</i>   | Figs. 3, 4 and S1 |
| <b>CMC329</b> | <i>h<sup>-</sup> ade6-M26</i>                                                                                                                                                    | Table S1          |
| <b>CMC368</b> | <i>h<sup>-</sup> ade6-M26 rec24-210::GFP-kanMX6</i>                                                                                                                              | Table S1          |
| <b>CMC373</b> | <i>h<sup>+</sup> ade6-3049 rec24-177::kanMX6</i>                                                                                                                                 | Table S1          |
| <b>CMC376</b> | <i>h<sup>+</sup> ade6-3049 rec7-212::kanMX6</i>                                                                                                                                  | Table S1          |
| <b>CMC377</b> | <i>h<sup>-</sup> ade6-M26 rec24-211::HA-kanMX6</i>                                                                                                                               | Table S1          |
| <b>CMC381</b> | <i>h<sup>+</sup> ade6-3049</i>                                                                                                                                                   | Table S1          |

|               |                                                                                                                                                                                       |          |
|---------------|---------------------------------------------------------------------------------------------------------------------------------------------------------------------------------------|----------|
| <b>CMC382</b> | <i>h<sup>-</sup> ade6-M26 rec7::GFP</i>                                                                                                                                               | Table S1 |
| <b>CMC385</b> | <i>h<sup>+</sup> ade6-3049 rec7::GFP</i>                                                                                                                                              | Table S1 |
| <b>CMC388</b> | <i>h<sup>+</sup> ade6-3049 rec24-211::HA-kanMX6</i>                                                                                                                                   | Table S1 |
| <b>CMC398</b> | <i>h<sup>+</sup> ade6-3049 rec24-210::GFP-kanMX6</i>                                                                                                                                  | Table S1 |
| <b>CMC408</b> | <i>h<sup>-</sup> ade6-M26 rec24-177::kanMX6</i>                                                                                                                                       | Table S1 |
| <b>CMC409</b> | <i>h<sup>-</sup> ade6-M26 rec7-212::kanMX6</i>                                                                                                                                        | Table S1 |
| <b>CMC416</b> | <i>h/h<sup>-</sup> pat1-114/pat1-114 ade6-M210/ade6-M216 leu1-32/leu1-32<br/>rec24-210::GFP-kanMX6/rec24-210::GFP-kanMX6<br/>rec7-212::kanMX6/rec7-212::kanMX6 mei4::GFP-hphMX6/+</i> | Fig. 5   |
| <b>CMC417</b> | <i>h/h<sup>-</sup> pat1-114/pat1-114 ade6-M210/ade6-M216 leu1-32/leu1-32<br/>rec24-210::GFP-kanMX6/rec24-210::GFP-kanMX6 mei4::GFP-<br/>hphMX6/+</i>                                  | Fig. 5   |
| <b>GP13</b>   | <i>h<sup>-</sup> ade6-52</i>                                                                                                                                                          | Table 1A |
| <b>GP24</b>   | <i>h<sup>+</sup> ade6-M26</i>                                                                                                                                                         | Table 1A |
| <b>GP2216</b> | <i>h<sup>+</sup> ade6-M26 ura4-294 rad32::ura4<sup>+</sup></i>                                                                                                                        | Table 1A |
| <b>GP3533</b> | <i>h<sup>+</sup> ade4-31 ura4-D18</i>                                                                                                                                                 | Table 1B |
| <b>GP3535</b> | <i>h<sup>-</sup> leu1-32 ura4-D18 spc1::ura4<sup>+</sup></i>                                                                                                                          | Table 1B |
| <b>GP4145</b> | <i>h<sup>-</sup> smt-0 ade6-52 ura4-D18 rad32::ura4<sup>+</sup></i>                                                                                                                   | Table 1A |
| <b>GP5597</b> | <i>h<sup>+</sup> ade4-31 ura4-D18 rec24-177::kanMX6</i>                                                                                                                               | Table 1B |
| <b>GP5598</b> | <i>h<sup>-</sup> ade4-31 ura4-D18 rec24-177::kanMX6</i>                                                                                                                               | Table 1B |
| <b>GP5632</b> | <i>h<sup>+</sup> ade6-M26 rec24-177::kanMX6</i>                                                                                                                                       | Table 1A |
| <b>GP5635</b> | <i>h<sup>-</sup> ade6-52 rec24-177::kanMX6</i>                                                                                                                                        | Table 1A |
| <b>GP5863</b> | <i>h<sup>+</sup> ade6-52 rec24-177::kanMX6 ura4-D18 rad32::ura4<sup>+</sup></i>                                                                                                       | Table 1A |
| <b>GP5865</b> | <i>h<sup>-</sup> smt-0 ade6-M26 rec24-177::kanMX6 ura4-D18 rad32::ura4<sup>+</sup></i>                                                                                                | Table 1A |
| <b>GP5602</b> | <i>h<sup>-</sup> leu1-32 ura4-D18 spc1::ura4<sup>+</sup> rec24-177::kanMX6</i>                                                                                                        | Table 1B |
| <b>GP5603</b> | <i>h<sup>+</sup> leu1-32 ura4-D18 spc1::ura4<sup>+</sup> rec24-177::kanMX6</i>                                                                                                        | Table 1B |

Alleles are commonly used autotrophic markers, the mating type locus, *rec7-212::kanMX6* (this study), *rec7::GFP* (Molnar et al., 2001), *rec8-206::kanMX6* (Martin-Castellanos et al., 2005), *rec10-175::kanMX6* (Ellermeier and Smith, 2005), *rec12-207::kanMX6* (Martin-Castellanos et al., 2005), *rec24-177::kanMX6* (Martin-Castellanos et al., 2005), *rec24-210::GFP-kanMX6* (this study), *rec24-211::HA-kanMX6* (this study), *mei4::GFP-hph* (this study), and *spc1::ura4<sup>+</sup>* (Shiozaki and Russell, 1995).
