# Supplementary material
Source: PubMed Central journal article supplement (PMC3065387)

diploid *pat1-114 rec24-GFP*

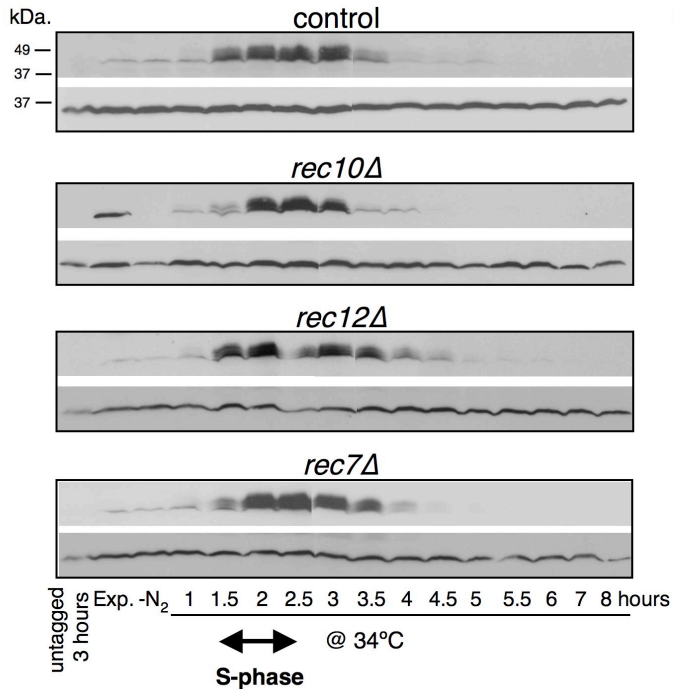

diploid *pat1-114 rec7-GFP*

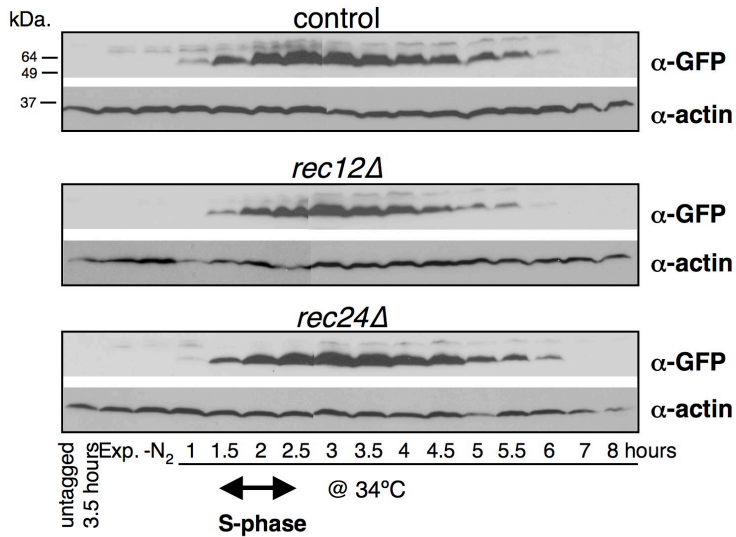

Supplement: jcs.079194_1.pdf [file jcs.079194_1.pdf]

**A**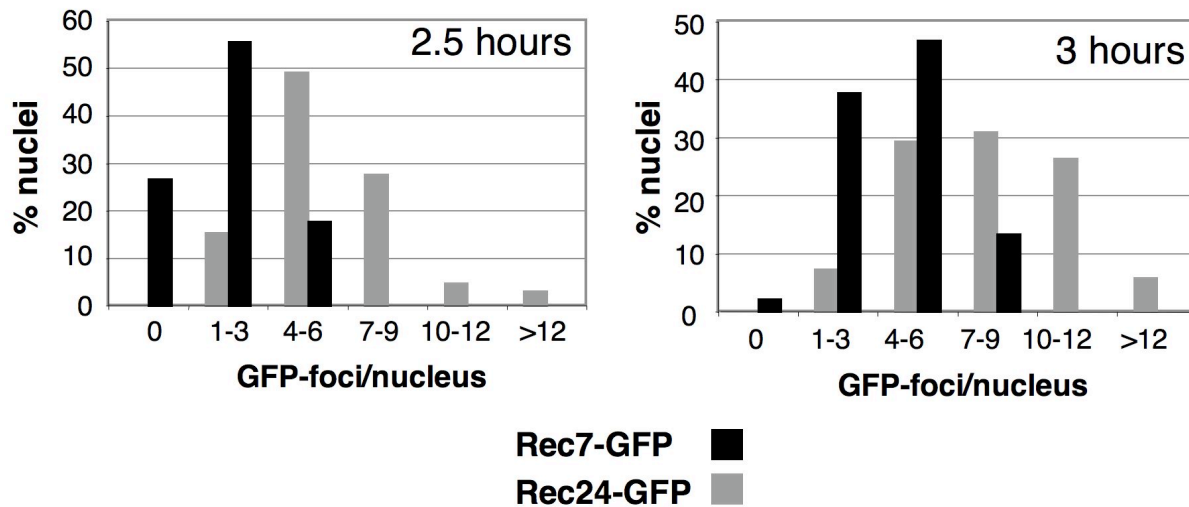**B**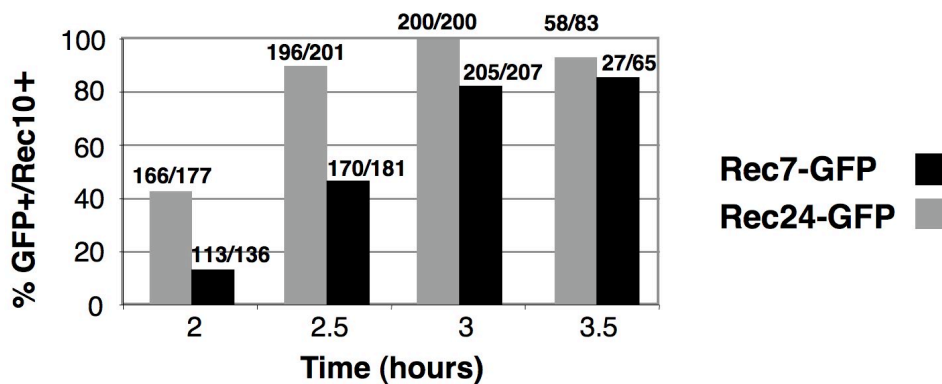

Supplement: jcs.079194_2.pdf [file jcs.079194_2.pdf]
